# Supplementary material for: A controlled growth of triangular AuCu alloy nanostars and high photocatalytic activities of AuCu@CdS heterostars
Source: Royal Society of Chemistry journal article supplement (doi:10.1039/d0tc00098a), 2020-01-01
Supplement: d0tc00098a1.pdf [file d0tc00098a1.pdf]

## Electronic Supplementary Information

### Controlled growth of triangular AuCu alloy nanostars and high photocatalytic activities of AuCu@CdS heterostars†

Qi-Yu Liu,<sup>\*a</sup> Yao Zhong,<sup>\*a,b</sup> Zheng-Zhi Jiang,<sup>a</sup> Kai Chen,<sup>b</sup> Song Ma,<sup>a</sup> Peng-Fei Wang,<sup>a</sup> Wei Wang,<sup>a</sup> Li Zhou,<sup>\*\*a</sup> Meng-Dai Luoshan,<sup>\*\*a,d</sup> Qu-Quan Wang<sup>\*\*a,b</sup>

<sup>a</sup>Key Laboratory of Artificial Micro- and Nano-structures of the Ministry of Education, School of Physics and Technology, Wuhan University, Wuhan 430072, China.

<sup>b</sup>Centre for Advanced Optoelectronic Functional Materials Research, Northeast Normal University, Changchun 130024, China

<sup>c</sup>The Institute for Advanced Studies, Wuhan University, Wuhan 430072, China.

<sup>d</sup>School of Science, Hubei University of Technology, Wuhan 430068, China

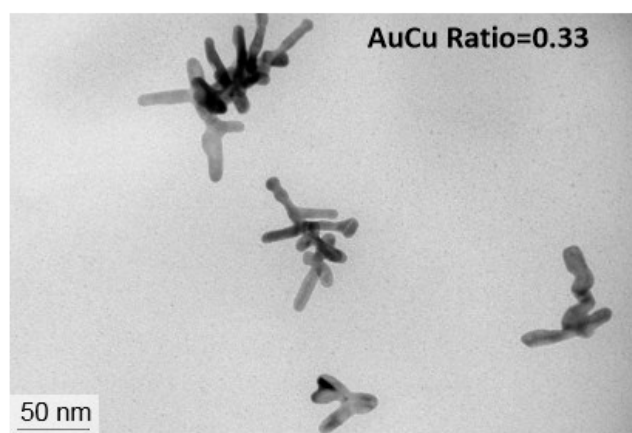

**Fig. S1** TEM image of irregular multibranches AuCu nanocrystals synthesized at  $\gamma_{\text{Cu}} = 0.75$  under 50 mg HDA.

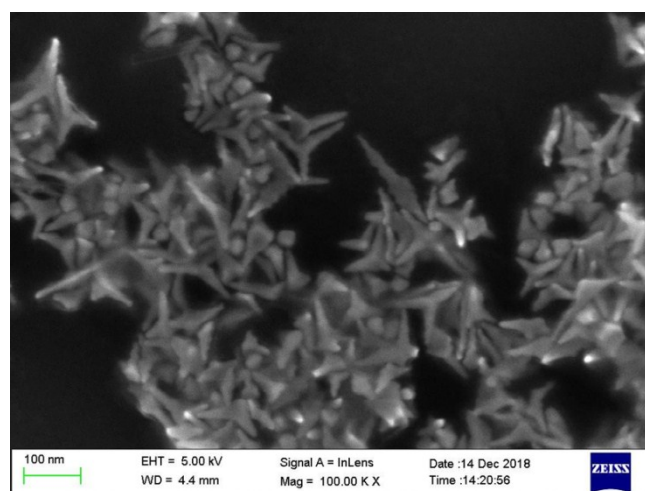

**Fig. S2** SEM image of a triangular AuCu nanostars synthesized at  $\gamma_{\text{Cu}} = 0.36$  under 50 mg HDA.

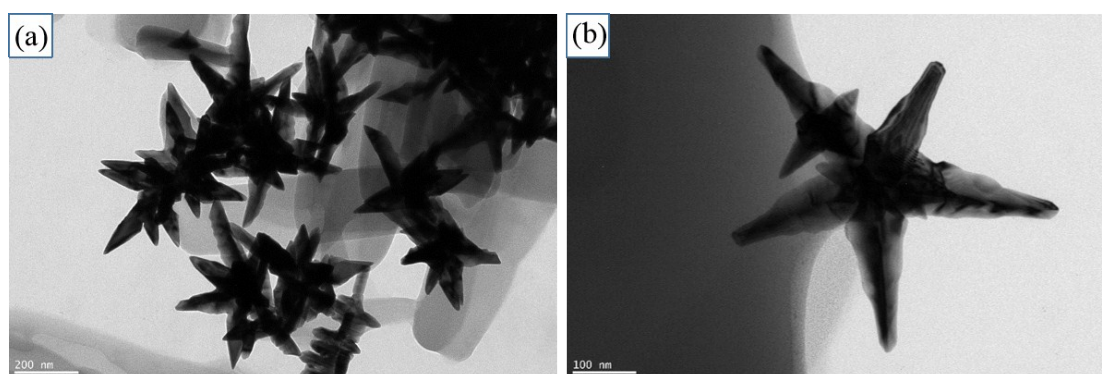

**Fig. S3** (a) TEM image of pentacle AuCu nanostars synthesized at  $\gamma_{\text{Cu}} = 0.5$  under less amount of HDA (40 mg). (b) TEM image of a typical individual pentacle AuCu nanostar with the secondary dendrites which size is around 450 nm.

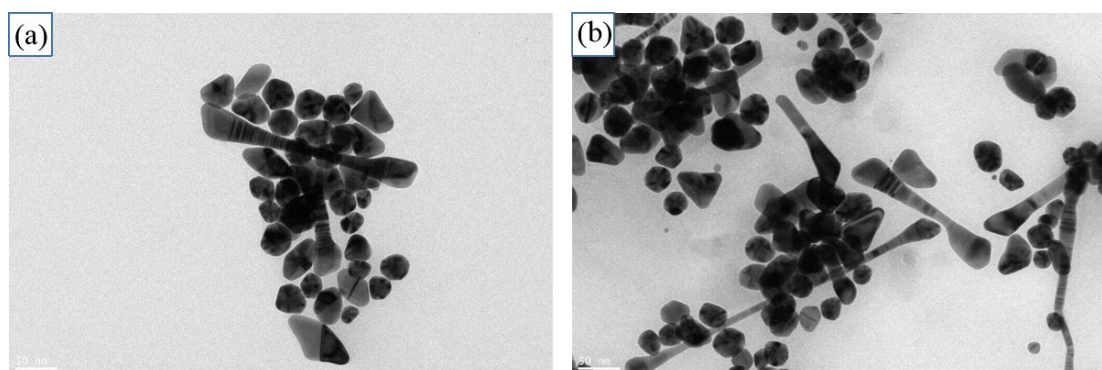

**Fig. S4** (a)(b) The TEM images of clava AuCu nanocrystals synthesized at  $\gamma_{\text{Cu}} = 0.28$  under 50 mg HDA.
